# Supplementary material for: Ligand Pose and Orientational Sampling in Molecular Docking
Source: PLoS One. 2013 Oct 1;8(10):e75992. doi: 10.1371/journal.pone.0075992 (PMC3787967; doi:10.1371/journal.pone.0075992)
Supplement: Table S3 — AUC across sampling/electrostatics. (XLSX) [file pone.0075992.s003.xlsx]

## Sheet: Supplementary Table S3
DUD-E target	20000 noE	5000 noE	2000 noE	500 noE	50 noE	20000 E	5000 E	2000 E	500 E	50 E	Note: Numbers represent performance in AUC (Area Under the Curve)
aa2ar	78.48	77.84	77.05	75.82	73.36	79.83	79.58	79.01	78.24	74.81	20000 noE	20000 orientational samples match goal, ligands build without electrostatics
abl1	79.43	76.31	69.4	67.82	61.54	81.14	79.4	72.13	70.41	62.65	5000 noE	5000 orientational samples match goal, ligands build without electrostatics
ace	55.83	54.42	55.03	52.04	54.65	43.68	41.44	42.38	42.42	45.54	2000 noE	2000 orientational samples match goal, ligands build without electrostatics
aces	72.43	72.67	71.37	66.82	59.1	69.6	69.1	67.97	62.96	55.96	500 noE	500 orientational samples match goal, ligands build without electrostatics
ada	76.74	71.61	69.87	68.38	65.85	74.3	71.39	69.31	69.93	66.46	50 noE	50 orientational samples match goal, ligands build without electrostatics
ada17	55.39	53.87	53.3	53.2	52.43	54.41	52.97	53.15	54.09	52.17	20000 E	20000 orientational samples match goal, ligands build with electrostatics
adrb1	70.32	69.54	67.04	62.75	62.25	70.47	69.41	65.28	59.96	60.26	5000 E	5000 orientational samples match goal, ligands build with electrostatics
adrb2	62.38	61.15	61.2	60.01	57.51	65.52	63.35	63.4	59.36	55.72	2000 E	2000 orientational samples match goal, ligands build with electrostatics
akt1	70.45	71.48	71.11	69.97	69.28	73.27	73.72	73.61	73.08	72.15	500 E	500 orientational samples match goal, ligands build with electrostatics
akt2	73.21	73.27	73.76	73.35	74.54	74.83	74.75	75.43	74.95	75.28	50 E	50 orientational samples match goal, ligands build with electrostatics
aldr	81.02	78.65	78.15	75.1	68.64	81.29	77.95	75.75	73.34	68.35
ampc	77.52	76.86	76.35	75.67	69.71	78.43	78.15	77.85	74.25	69.83
andr	47.28	47.6	47.53	47.27	46.39	45.72	46.15	46.12	46.04	46.04
aofb	73.72	71.3	71.18	63.37	49.83	73.95	71.84	71.43	64.52	50.1
bace1	63.22	64.25	64.58	64.1	63.15	62.19	63.61	63.84	62.56	62.21
braf	73.45	73.89	73.58	72.27	69.45	74.63	75.06	74.85	73.57	71.06
cah2	59.71	60.11	57.29	56.22	51.54	60.46	60.74	58.01	55.97	51.78
casp3	71.35	71.42	70.28	72.11	71.84	68.33	68.79	68.91	69.88	68.84
cdk2	72.32	71.88	72.96	71.16	66.08	74.84	74.25	75	72.25	65.96
comt	94.54	94.42	93.41	94.94	91.06	94.16	93.89	93.49	95.17	91.58
cp2c9	55.29	53.16	52.92	51.82	52.36	55.19	53.87	53.11	52.54	53.66
cp3a4	51.14	49.89	49.93	51.55	49.53	53.56	51.98	51.94	52.31	50.79
csf1r	83.94	82.84	81.97	80.19	73.84	84.67	83.06	82	79.89	72.44
cxcr4	61.88	61.56	60.12	55.8	60.43	60.42	59.39	60.81	58.42	63.14
def	53.02	49.74	47.12	44.93	45.4	50.65	48.55	47.34	43.87	41.75
dhi1	57.47	58.05	56.48	53.92	54.74	56.22	56.6	55.12	53.86	54.44
dpp4	77.71	78.45	77.8	75.3	74.26	73.23	73.7	72.44	69.93	70.4
drd3	67.91	66.99	66.57	66.79	65.53	69.29	68.21	67.04	66.74	64.19
dyr	60.89	59.48	58.72	59.93	56.8	57.99	57.05	56.26	57.9	56.19
egfr	83.74	82.06	81.52	79.25	71.5	85.5	84.23	83.81	80.51	73.28
esr1	54.75	53.95	52.07	53.29	53.08	56.02	54.86	52.96	54.58	54.36
esr2	55.49	52.36	52.16	51.07	49.31	57.4	53.81	53.84	52.9	50.28
fa10	86.31	86.23	85.3	81.76	79.46	84.55	84.23	83.51	80.13	78.22
fa7	89.07	88.86	87.82	87.37	86.61	81.85	81.68	81.59	80.44	78.93
fabp4	91.61	91.01	90.92	92.22	91.35	83.45	82.61	83.64	86.79	84.65
fak1	72.04	67.91	64.13	57.44	56.65	67.82	63.88	58.5	53.69	52.38
fgfr1	62.64	60.5	60.09	57.21	53.39	60.65	59.18	58.54	56.66	52.23
fkb1a	62.45	62.55	61.07	59.62	70.87	62.59	61.9	62.1	62.8	70.37
fnta	73.34	72.94	73.34	72.86	74.98	74.43	74	74.09	73.35	75.26
fpps	58.99	59.36	59.82	59.2	56.86	52.06	54.45	54.84	54.86	55.87
gcr	31.88	32.58	32.86	34.31	38.67	33.21	33.71	34.1	35.68	39.86
glcm	64.06	64.77	64.87	63.55	61.66	74.1	74.51	74.78	72.59	68.77
gria2	69.89	69.27	69.01	68.79	68.85	70.65	70.38	70.53	69.98	69.61
grik1	80.07	75.65	74.65	69.48	60.79	60.49	56.96	56.54	56.95	53.49
hdac2	70.6	69.71	70.83	69.92	72.16	65.79	65.07	65.64	66.24	67.53
hdac8	69.36	69.2	68.53	63.21	60.3	70.73	70.91	70.37	66.16	64.42
hivint	63.39	63.84	64.77	68.22	64.24	64.59	65.37	65.97	69.07	63.73
hivpr	49.97	48.52	46.89	44.59	44.23	46.4	44.96	43.64	42.54	42.67
hivrt	61.67	58.04	56.53	53.46	56.25	62.19	58.51	56.59	52.91	55.96
hmdh	67.89	68.91	70.31	68.84	69.72	69.92	71.19	71.29	71.68	69.91
hs90a	61.42	62.7	61.68	58.64	59.45	64.27	64.37	63.68	61.43	63.63
hxk4	75.49	79.01	77.75	74.58	66.62	74.92	78.49	77.75	77.69	67.94
igf1r	72.39	70.85	70.71	69.35	74.65	73.65	72.73	73.16	71.14	75.44
inha	75.46	76.91	74.81	70.71	65.07	77.14	79.04	76.21	71.58	66.04
ital	59.61	58.12	57.44	57.9	57.99	60.62	60.56	60.48	59.85	60.68
jak2	79.49	79.89	79.49	77.27	75.78	79.61	79.86	79.73	77.66	75.66
kif11	67.39	66	63.29	58.48	53.99	64.36	63.47	59.9	53.66	49.51
kit	69.26	68.25	65.3	65.08	65.74	69.36	67.73	66.78	66.92	66.66
kith	78.06	70.11	65.62	67.91	61.74	84.8	76.01	72.12	66.89	58.69
kpcb	58.5	59.52	59.51	62.34	54.46	59.01	59.74	59.96	63	53.48
lck	77.95	76.36	75.67	74.93	71.95	78.9	77.73	77.39	76.69	73.76
lkha4	78.75	80.75	81.38	72.46	65.96	77.82	79.11	79.85	72.72	63.6
mapk2	73.34	73.1	74.32	75.84	76.46	75.23	74.94	75.84	76.99	77.43
mcr	41.3	42.35	40.85	42.32	45.25	41.58	42.02	40.51	42.24	45.51
met	72.34	68.78	66.89	64.04	65.11	74.81	71.66	69.42	67.46	69.77
mk01	70.21	72.56	70.92	70.44	60.16	75.11	76.87	75.52	70.71	62.57
mk10	80.59	80.71	79.77	78.99	75.97	82.26	82.2	81.2	80.14	78.11
mk14	66.11	66.04	65.35	64.95	64.17	69.61	69.09	68.16	67.58	66.14
mmp13	59.12	59.77	60.06	60.88	62.94	58.99	59.31	60.29	60.25	61.71
mp2k1	68.52	70.25	68.81	67.29	63.67	73.8	74.75	72.99	70.8	66.79
nos1	70.93	72.41	73.86	74.76	70.5	73.93	75.75	76.17	77.76	71.18
nram	72.83	67.63	62.26	54.04	43.14	70.78	67.27	60.21	51.47	41.77
pa2ga	58.77	52.34	51.69	43.77	48.67	53.77	47.87	46.74	42.53	46.23
parp1	73.68	73.93	74.14	75.85	74.14	75.04	75.41	75.91	78.3	75.93
pde5a	57.64	56.1	56.09	54.47	50.85	59.8	58.8	58.98	56.6	52.56
pgh1	51.23	48.81	47.46	43.55	45.52	51.29	49.3	47.98	45.2	45.93
pgh2	55.43	55.33	55.34	53.97	55.79	57.79	57.74	57.35	55.63	57.01
plk1	85.77	84.15	82.83	80.82	73.21	86.15	84.5	83.56	79.82	73
pnph	72.61	73.69	75	75.57	76.4	75.78	76.68	77.79	76.48	75.69
ppara	76.42	75.46	74.41	71.74	66.91	77.56	76.65	75.19	72.88	68.03
ppard	82.94	77.29	74.33	71.59	68.71	82.64	78.4	76.37	74.66	72.33
pparg	71.31	70.37	68.82	67.2	67.05	74.02	73.24	70.95	67.65	67.4
prgr	49.61	48.03	46.25	43.17	44.2	48.2	47.1	45.68	42.97	44.1
ptn1	81.7	81.68	80.35	76.25	71.81	81.85	81.15	79.14	74.91	72.04
pur2	69.99	60.02	57.33	46.06	45.44	64.97	56.35	55.15	42.67	42.88
pygm	55.34	54.03	53.79	54.17	54.09	51.46	48.7	48.96	50.09	50.53
pyrd	88.05	87.66	86.32	81.14	81.17	87.06	86.63	85.49	79.98	79.76
reni	63.35	62.8	61.61	59.03	54.31	59.73	59.1	59.23	58	54.95
rock1	76.86	75.91	75.79	73.84	71	80.07	80.33	80.16	78.05	73.26
rxra	50.99	45.96	40.92	39.44	42.92	50.47	47.46	41.09	40.88	43.69
sahh	82.88	81.69	82.09	81.09	79.89	83.87	82.9	83.99	82.83	82.15
src	71.99	66.01	62.58	62.91	63.67	72.87	67.73	64.56	65.03	66.04
tgfr1	72.66	71.57	70.16	69.44	67.76	75.94	75.41	74.54	73.43	70.52
thb	78.49	77.96	76.26	73.23	65.98	79.08	78.16	77.31	74.71	66.8
thrb	76.18	75.26	74.81	72.59	68.09	68.42	67.45	66.42	63.9	60.66
try1	86.49	86.65	86.34	83.23	80.88	81.5	81.55	81.45	78.19	76.62
tryb1	86.2	87.07	86.43	85.06	78.21	76.08	77.22	76.03	74.55	69.3
tysy	60.6	57.6	58.49	54.58	51	64.41	60.71	59.51	55.01	50.9
urok	93.11	91.86	90.5	89.59	85.69	90.6	89.89	87.8	88.13	85.18
vgfr2	72.82	72.54	71.95	69.73	65.99	74.75	74.31	73.51	71.28	67.38
wee1	95.15	94.64	94.64	93.97	92.52	96.12	95.59	95.56	94.55	93.12
xiap	76.29	73.99	75.74	72.78	74.77	65.3	62.6	63.87	64.58	67.59
mean over all 102	69.6163	68.5626	67.6643	65.895	63.916	69.155	68.1959	67.3278	65.6573	63.5606
stdev	11.9583	12.1585	12.3134	12.445	11.6428	12.17	12.4382	12.5351	12.5685	11.7346
