# Supplementary material for: Ligand Pose and Orientational Sampling in Molecular Docking
Source: PLoS One. 2013 Oct 1;8(10):e75992. doi: 10.1371/journal.pone.0075992 (PMC3787967; doi:10.1371/journal.pone.0075992)
Supplement: Table S4 — EF1 across sampling/electrostatics. (XLSX) [file pone.0075992.s004.xlsx]

## Sheet: Supplementary Table S4
DUD-E target	20000 noE	5000 noE	2000 noE	500 noE	50 noE	20000 E	5000 E	2000 E	500 E	50 E	Note: Numbers represent performance in EF1 (enrichment factor at 1%)
aa2ar	12.4481	14.1079	14.1079	13.4855	17.6349	14.3154	15.9751	15.5602	13.9004	16.805	20000 noE	20000 orientational samples match goal, ligands build without electrostatics
abl1	18.1319	13.7363	10.4396	9.3407	9.3407	18.6813	14.2857	11.5385	10.4396	10.989	5000 noE	5000 orientational samples match goal, ligands build without electrostatics
ace	2.8369	2.4823	2.4823	4.2553	5.6738	2.1277	1.4184	1.773	2.4823	2.1277	2000 noE	2000 orientational samples match goal, ligands build without electrostatics
aces	17.4393	17.2185	16.777	14.7903	11.9205	11.6998	11.479	11.2583	9.4923	7.947	500 noE	500 orientational samples match goal, ligands build without electrostatics
ada	4.3011	4.3011	7.5269	8.6022	8.6022	4.3011	6.4516	15.0538	12.9032	13.9785	50 noE	50 orientational samples match goal, ligands build without electrostatics
ada17	5.2632	4.3233	4.1353	4.5113	3.0075	6.015	4.8872	5.0752	5.2632	3.3835	20000 E	20000 orientational samples match goal, ligands build with electrostatics
adrb1	8.9069	12.1457	10.1215	10.9312	14.17	10.5263	13.7652	9.7166	7.2874	10.9312	5000 E	5000 orientational samples match goal, ligands build with electrostatics
adrb2	14.7186	12.5541	10.8225	9.5238	6.9264	10.3896	10.8225	11.2554	9.5238	6.9264	2000 E	2000 orientational samples match goal, ligands build with electrostatics
akt1	37.5427	33.1058	34.471	30.3754	30.0341	38.5666	38.9078	39.5904	36.8601	30.3754	500 E	500 orientational samples match goal, ligands build with electrostatics
akt2	14.5299	17.094	17.094	17.094	15.3846	18.8034	17.9487	17.9487	17.094	13.6752	50 E	50 orientational samples match goal, ligands build with electrostatics
aldr	37.1069	32.0755	30.8176	26.4151	18.8679	42.1384	31.4465	28.9308	23.8994	10.6918
ampc	0	0	0	2.0833	6.25	0	0	0	6.25	8.3333
andr	2.974	3.3457	3.3457	4.461	3.3457	2.974	3.3457	3.7175	4.461	2.6022
aofb	5.7377	4.0984	5.7377	1.6393	0.8197	6.5574	5.7377	7.377	2.459	0.8197
bace1	6.7138	8.1272	8.8339	7.4205	8.8339	6.7138	8.8339	7.7739	7.7739	7.7739
braf	3.2895	2.6316	2.6316	4.6053	2.6316	3.2895	3.2895	3.2895	3.9474	1.3158
cah2	5.4878	7.5203	8.7398	9.9593	6.7073	4.4715	6.3008	7.7236	7.7236	5.4878
casp3	3.5176	6.5327	2.0101	2.5126	3.5176	1.005	1.5075	2.0101	3.0151	5.5276
cdk2	5.2743	4.6414	3.1646	3.3755	4.0084	7.5949	5.0633	5.0633	4.8523	4.4304
comt	68.2927	65.8537	73.1707	75.6098	65.8537	51.2195	51.2195	68.2927	75.6098	63.4146
cp2c9	6.6667	6.6667	5.8333	4.1667	3.3333	6.6667	6.6667	5	2.5	3.3333
cp3a4	0	0.5882	1.1765	1.1765	1.7647	0.5882	0.5882	0	1.7647	1.1765
csf1r	18.0723	19.8795	22.8916	21.6867	16.2651	23.494	25.3012	26.506	24.6988	18.6747
cxcr4	0	2.5	0	0	5	0	0	2.5	2.5	5
def	11.7647	7.8431	10.7843	2.9412	4.902	10.7843	10.7843	6.8627	0.9804	2.9412
dhi1	3.3333	3.9394	3.6364	4.2424	4.2424	2.7273	3.3333	4.2424	6.3636	4.2424
dpp4	29.2683	27.3921	26.8293	24.9531	24.2026	23.6398	21.576	21.2008	18.1989	19.137
drd3	6.6667	5.625	5.4167	5.625	5	7.9167	7.5	7.9167	7.2917	5.625
dyr	22.9437	22.0779	21.2121	20.3463	15.5844	22.5108	22.5108	19.9134	17.316	14.2857
egfr	24.9077	27.1218	27.8598	24.7232	17.3432	31.7343	31.5498	31.3653	26.5683	15.6827
esr1	9.9217	7.0496	6.7885	5.7441	5.7441	8.3551	6.2663	6.5274	6.7885	6.0052
esr2	16.0763	15.2589	14.9864	14.9864	12.5341	14.9864	15.2589	16.0763	16.0763	12.8065
fa10	34.0782	34.8231	33.1471	28.3054	27.3743	37.4302	34.8231	35.1955	28.4916	25.8845
fa7	69.2982	65.7895	64.0351	59.6491	57.8947	58.7719	56.1404	53.5088	43.8596	45.614
fabp4	38.2979	38.2979	34.0426	36.1702	34.0426	19.1489	21.2766	19.1489	17.0213	17.0213
fak1	10	9	10	9	10	12	13	13	14	13
fgfr1	5.7554	2.8777	1.4388	2.1583	1.4388	4.3165	3.5971	5.036	4.3165	1.4388
fkb1a	0.9009	1.8018	2.7027	5.4054	5.4054	0.9009	3.6036	2.7027	2.7027	3.6036
fnta	1.1824	1.1824	1.5203	1.5203	1.8581	2.5338	2.8716	3.0405	2.7027	2.027
fpps	18.8235	18.8235	20	20	15.2941	5.8824	5.8824	7.0588	8.2353	8.2353
gcr	2.3256	2.3256	1.5504	1.1628	0.7752	1.5504	1.1628	1.1628	1.1628	0.7752
glcm	22.2222	18.5185	18.5185	16.6667	11.1111	35.1852	27.7778	16.6667	12.963	16.6667
gria2	11.3924	14.557	17.0886	18.9873	20.8861	17.0886	19.6203	20.8861	21.519	24.6835
grik1	24.7525	15.8416	12.8713	11.8812	15.8416	14.8515	10.8911	10.8911	12.8713	7.9208
hdac2	12.973	9.7297	10.8108	10.2703	10.2703	12.973	12.973	11.3514	11.3514	10.8108
hdac8	6.4706	7.0588	7.0588	2.9412	2.3529	11.1765	12.9412	11.7647	4.7059	3.5294
hivint	0	2	1	2	3	4	6	6	10	6
hivpr	0.1866	0.3731	0.3731	0.1866	0.3731	0.1866	0	0.1866	0.1866	0.1866
hivrt	4.142	4.7337	4.4379	2.9586	1.4793	5.3254	4.142	2.9586	2.3669	1.7751
hmdh	26.4706	24.1176	27.6471	29.4118	27.6471	27.6471	24.7059	23.5294	31.1765	27.6471
hs90a	5.6818	4.5455	6.8182	5.6818	5.6818	7.9545	5.6818	5.6818	6.8182	5.6818
hxk4	6.5217	9.7826	5.4348	7.6087	2.1739	6.5217	10.8696	5.4348	7.6087	5.4348
igf1r	2.7027	2.7027	3.3784	1.3514	0.6757	1.3514	1.3514	2.027	2.7027	0.6757
inha	0	2.3256	6.9767	6.9767	9.3023	2.3256	9.3023	6.9767	6.9767	9.3023
ital	11.5942	10.1449	10.1449	9.4203	8.6957	9.4203	10.8696	10.8696	9.4203	8.6957
jak2	27.1028	28.972	25.2336	17.757	13.0841	34.5794	30.8411	27.1028	19.6262	17.757
kif11	27.5862	30.1724	29.3103	26.7241	21.5517	28.4483	30.1724	27.5862	23.2759	21.5517
kit	1.8072	3.012	3.6145	5.4217	3.6145	3.012	4.2169	3.6145	4.8193	3.6145
kith	0	0	0	0	7.0175	5.2632	7.0175	0	5.2632	10.5263
kpcb	11.1111	9.6296	9.6296	10.3704	8.8889	13.3333	11.8519	14.0741	14.8148	11.1111
lck	16.9048	15.2381	15.7143	13.5714	16.4286	17.1429	18.8095	17.8571	19.2857	20.2381
lkha4	2.924	4.6784	1.1696	0.5848	2.924	4.6784	5.2632	0.5848	0.5848	2.924
mapk2	21.7822	23.7624	28.7129	32.6733	38.6139	38.6139	34.6535	39.604	39.604	44.5545
mcr	1.0638	1.0638	1.0638	0	1.0638	0	0	1.0638	0	0
met	6.6265	7.2289	6.0241	5.4217	6.0241	10.241	9.0361	10.8434	6.6265	4.8193
mk01	2.5316	1.2658	3.7975	1.2658	1.2658	3.7975	8.8608	8.8608	5.0633	0
mk10	19.2308	22.1154	20.1923	22.1154	17.3077	15.3846	18.2692	17.3077	21.1538	18.2692
mk14	6.4014	5.5363	6.0554	6.2284	6.9204	6.9204	6.4014	5.5363	6.7474	5.8824
mmp13	2.7972	3.3217	3.4965	4.021	3.3217	2.4476	3.1469	4.3706	3.6713	4.5455
mp2k1	7.438	7.438	3.3058	2.4793	3.3058	10.7438	11.5702	4.9587	4.9587	3.3058
nos1	2	5	4	4	6	6	8	5	5	5
nram	4.0816	3.0612	6.1224	10.2041	10.2041	4.0816	10.2041	9.1837	9.1837	9.1837
pa2ga	2.0202	2.0202	2.0202	1.0101	2.0202	2.0202	2.0202	2.0202	2.0202	2.0202
parp1	9.4488	11.6142	12.4016	16.1417	15.5512	13.7795	15.1575	17.126	19.2913	18.5039
pde5a	0.7538	1.005	1.5075	2.5126	3.7688	0.5025	0.7538	2.2613	2.7638	4.0201
pgh1	2.0513	2.5641	1.0256	0	0.5128	2.5641	2.5641	0.5128	0	0
pgh2	2.9885	3.908	4.8276	5.5172	5.977	3.4483	5.5172	5.0575	6.2069	5.7471
plk1	18.6916	11.215	14.9533	7.4766	3.7383	29.9065	18.6916	15.8879	7.4766	5.6075
pnph	1.9417	0.9709	1.9417	1.9417	7.767	1.9417	1.9417	0.9709	4.8544	17.4757
ppara	4.0214	5.0938	4.2895	2.4129	2.4129	6.1662	6.9705	5.3619	3.2172	2.4129
ppard	9.5833	8.75	10.4167	5.4167	5.4167	14.1667	10.8333	12.0833	7.0833	5.8333
pparg	6.6116	6.405	5.9917	6.1983	6.1983	7.438	8.4711	6.405	6.6116	5.7851
prgr	3.0717	3.413	2.0478	2.0478	1.0239	3.0717	3.7543	2.0478	2.0478	1.0239
ptn1	23.0769	19.2308	10	23.0769	22.3077	20.7692	15.3846	19.2308	16.1538	12.3077
pur2	10	6	6	4	6	8	6	4	0	0
pygm	2.5974	0	0	0	0	1.2987	0	0	1.2987	3.8961
pyrd	40.5405	39.6396	35.1351	31.5315	34.2342	34.2342	30.6306	30.6306	29.7297	29.7297
reni	14.4231	11.5385	11.5385	7.6923	5.7692	21.1538	17.3077	18.2692	10.5769	10.5769
rock1	8	9	6	5	4	15	12	13	9	5
rxra	0.7634	0.7634	0.7634	0	0	0	0.7634	0.7634	0	0
sahh	33.3333	17.4603	22.2222	26.9841	33.3333	36.5079	25.3968	23.8095	38.0952	38.0952
src	7.2519	3.626	3.626	5.5344	3.4351	6.8702	3.626	4.0076	6.2977	4.1985
tgfr1	9.7744	8.2707	9.7744	9.0226	9.7744	9.7744	7.5188	9.7744	8.2707	7.5188
thb	40.7767	33.9806	33.0097	27.1845	14.5631	36.8932	36.8932	33.9806	28.1553	19.4175
thrb	19.9566	19.3059	17.5705	16.4859	9.7614	15.1844	12.7983	13.0152	10.1952	7.3753
try1	43.8753	45.4343	45.4343	40.5345	40.3118	39.6437	39.8664	40.3118	34.0757	33.853
tryb1	35.1351	35.8108	31.0811	28.3784	15.5405	29.7297	29.7297	29.0541	24.3243	14.1892
tysy	15.5963	13.7615	13.7615	11.9266	11.0092	14.6789	16.5138	15.5963	12.844	10.0917
urok	64.8148	63.5802	61.7284	59.2593	46.9136	66.0494	64.1975	59.2593	56.1728	47.5309
vgfr2	8.313	8.0685	7.0905	6.6015	4.89	8.313	9.0465	7.0905	5.6235	3.912
wee1	68.6275	70.5882	74.5098	78.4314	77.451	74.5098	75.4902	78.4314	79.4118	78.4314
xiap	12	15	17	16	19	11	13	13	13	20
mean over all 102	13.9347	13.3599	13.2348	12.6711	11.8945	14.2416	13.8692	13.4965	12.6855	11.5774
stdev	15.5283	14.9625	15.1276	14.9288	13.7603	14.9399	14.0282	14.4789	14.173	13.2352
